# Supplementary material
Source: PubMed Central journal article supplement (PMC3890871)
Supplement: 1309543111_pnas.201309543SI.pdf [file 1309543111_pnas.201309543SI.pdf]

# Supporting Information

Sudhakaran et al. 10.1073/pnas.1309543111

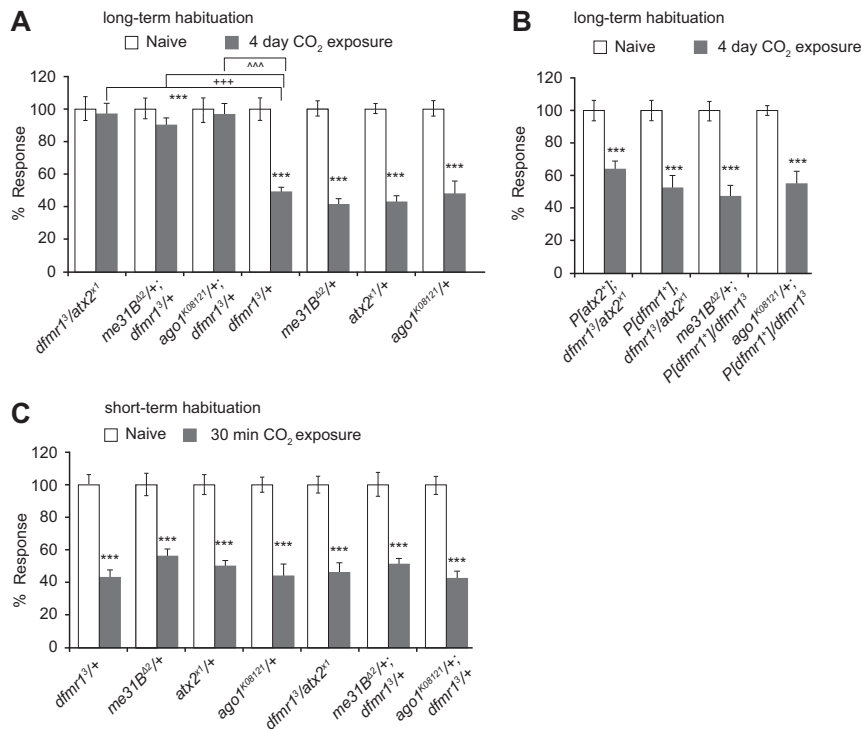

**Fig. S1.** dFmr1 interacts with Atx2, Me31B, and Ago1 for long-term habituation (LTH) to CO<sub>2</sub>. (A) Compared with dFmr1 in heterozygous condition (*dfmr1<sup>3</sup>/+*), transheterozygote flies for *dfmr1<sup>3</sup>/atx2<sup>x1</sup>* ( $q = 10.654$ ,  $***P < 0.001$ ), *me31B<sup>Δ2</sup>/+;dfmr1<sup>3</sup>/+* ( $q = 9.653$ ,  $+++P < 0.001$ ), and *ago1<sup>K08121</sup>/+;dfmr1<sup>3</sup>/+* ( $q = 7.365$ ,  $^^P < 0.001$ ) show a defect in LTH formation after 4-d exposure to CO<sub>2</sub> (gray bars). Flies heterozygous for Atx2, Me31B, and Ago1 (*atx2<sup>x1</sup>/+*, *me31B<sup>Δ2</sup>/+*, and *ago1<sup>K08121</sup>/+*) show normal LTH after exposure to CO<sub>2</sub>. (B) The expression of an Ataxin2 genomic rescue transgene (*P[atx2+]*) (1) restores the LTH defect in *dfmr1<sup>3</sup>/atx2<sup>x1</sup>* flies, and LTH defects observed in *dfmr1<sup>3</sup>/atx2<sup>x1</sup>*, *me31B<sup>Δ2</sup>/+;dfmr1<sup>3</sup>/+*, and *ago1<sup>K08121</sup>/+;dfmr1<sup>3</sup>/+* flies are rescued by the expression of a dFmr1 genomic rescue transgene (*P[dfmr1+]*) (2). (C) Transheterozygote *dfmr1<sup>3</sup>/atx2<sup>x1</sup>*, *me31B<sup>Δ2</sup>/+;dfmr1<sup>3</sup>/+*, and *ago1<sup>K08121</sup>/+;dfmr1<sup>3</sup>/+* flies, as well as heterozygous mutations, do not show a defect in short-term habituation (STH); (A–C) Gray bars indicate CO<sub>2</sub>-exposed and white bars indicate air-exposed flies. Error bars show  $\pm$ SEM ( $n > 8$  sets). Student *t* test performed ( $**P < 0.01$ ,  $***P < 0.001$ ) except in A, which uses two-way ANOVA.

- McCann C, et al. (2011) The Ataxin-2 protein is required for microRNA function and synapse-specific long-term olfactory habituation. *Proc Natl Acad Sci USA* 108(36):E655–E662.
- Bolduc FV, Bell K, Cox H, Broadie KS, Tully T (2008) Excess protein synthesis in *Drosophila* fragile X mutants impairs long-term memory. *Nat Neurosci* 11(10):1143–1145.

*LN1GAL4,tubGAL80<sup>ts</sup> > UAS Me31B RNAi*

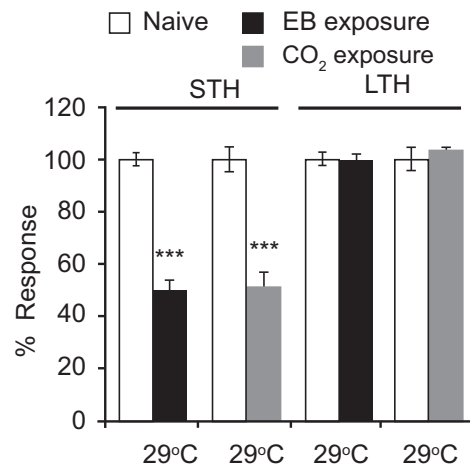

**Fig. S2.** Knockdown of Me31B in local circuit interneurons (LNs) block LTH. Flies exposed to ethyl butyrate (EB) (black bars) or CO<sub>2</sub> (gray bars) and paraffin oil or air, respectively (white bars). Adult-specific knockdown of Me31B in LNs shows defects in LTH. For adult-specific knockdown, flies were shifted to 29 °C after eclosion and during odor exposure to specifically knock down Me31B in adults. *LN1-GAL4,tubGAL80<sup>ts</sup>>Me31BRNAi* flies show a defect in LTH to both EB and CO<sub>2</sub>, whereas they show normal STH. Error bars show ±SEM ( $n > 8$  sets). \*\* $P < 0.01$ , \*\*\* $P < 0.001$  (Student  $t$  test).

**Table S1. Raw values of behavior experiments**

| Genotype                                                               | Odorant exposed              | Naïve (n)        | After exposure (n) |
|------------------------------------------------------------------------|------------------------------|------------------|--------------------|
|                                                                        | 5% EB (30 min)               |                  |                    |
| CS                                                                     |                              | 0.68 ± 0.02 (10) | 0.33 ± 0.02 (10)   |
| <i>dfmr1<sup>B55</sup></i>                                             |                              | 0.68 ± 0.01 (11) | 0.40 ± 0.03 (11)   |
| <i>dfmr1<sup>3</sup></i>                                               |                              | 0.71 ± 0.05 (8)  | 0.25 ± 0.03 (9)    |
| <i>GH14GAL4, tubGAL80 &lt;UASdfmr1RNAi</i>                             | at 18 °C                     | 0.68 ± 0.02 (9)  | 0.31 ± 0.02 (10)   |
| <i>GH14GAL4, tubGAL80ts &lt;UASdfmr1RNAi</i>                           | at 29 °C                     | 0.66 ± 0.04 (10) | 0.33 ± 0.02 (10)   |
| <i>dfmr1<sup>3</sup>/+</i>                                             |                              | 0.67 ± 0.01 (15) | 0.31 ± 0.02 (15)   |
| <i>me31B<sup>Δ2</sup>/+</i>                                            |                              | 0.64 ± 0.03 (6)  | 0.38 ± 0.04 (6)    |
| <i>atx2<sup>x1</sup>/+</i>                                             |                              | 0.65 ± 0.02 (8)  | 0.36 ± 0.06 (8)    |
| <i>ago1<sup>K08121</sup>/+</i>                                         |                              | 0.68 ± 0.03 (6)  | 0.29 ± 0.03 (6)    |
| <i>dfmr1<sup>3</sup>/atx2<sup>x1</sup></i>                             |                              | 0.71 ± 0.04 (8)  | 0.34 ± 0.05 (8)    |
| <i>me31B<sup>Δ2</sup>/dfmr1<sup>3</sup></i>                            |                              | 0.75 ± 0.01 (6)  | 0.35 ± 0.02 (6)    |
| <i>ago1<sup>K08121</sup>/dfmr1<sup>3</sup></i>                         |                              | 0.70 ± 0.03 (8)  | 0.33 ± 0.02 (8)    |
| <i>LN1GAL4, tubGAL80ts &lt;UASdfmr1RNAi</i>                            | at 29 °C                     | 0.72 ± 0.04 (9)  | 0.38 ± 0.03 (9)    |
| <i>LN1GAL4, tubGAL80ts &lt;UASAtx2RNAi</i>                             | at 29 °C                     | 0.62 ± 0.02 (8)  | 0.25 ± 0.03 (8)    |
|                                                                        | 15% CO <sub>2</sub> (30 min) |                  |                    |
| CS                                                                     |                              | 0.70 ± 0.02 (8)  | 0.36 ± 0.02 (8)    |
| <i>dfmr1<sup>B55</sup></i>                                             |                              | 0.68 ± 0.03 (9)  | 0.34 ± 0.02 (9)    |
| <i>dfmr1<sup>3</sup></i>                                               |                              | 0.69 ± 0.03 (10) | 0.31 ± 0.03 (10)   |
| <i>LN1GAL4, tubGAL80ts &lt;UASdfmr1RNAi</i>                            | at 29 °C                     | 0.67 ± 0.04 (8)  | 0.43 ± 0.03 (8)    |
| <i>LN1GAL4, tubGAL80ts &lt;UASAtx2RNAi</i>                             | at 29 °C                     | 0.59 ± 0.01 (11) | 0.21 ± 0.03 (11)   |
|                                                                        | 20% EB (4 d)                 |                  |                    |
| CS                                                                     |                              | 0.65 ± 0.03 (9)  | 0.31 ± 0.03 (9)    |
| <i>dfmr1<sup>B55</sup></i>                                             |                              | 0.66 ± 0.01 (9)  | 0.61 ± 0.03 (9)    |
| <i>dfmr1<sup>3</sup></i>                                               |                              | 0.66 ± 0.03 (9)  | 0.59 ± 0.03 (9)    |
| <i>P[dfmr1<sup>+</sup>], dfmr1<sup>3</sup></i>                         |                              | 0.69 ± 0.03 (10) | 0.35 ± 0.02 (10)   |
| <i>GH14GAL4, tubGAL80ts &lt;UASdfmr1RNAi</i>                           | at 18 °C                     | 0.65 ± 0.02 (11) | 0.38 ± 0.02 (11)   |
| <i>GH14GAL4, tubGAL80ts &lt;UASdfmr1RNAi</i>                           | at 29 °C                     | 0.70 ± 0.02 (11) | 0.67 ± 0.02 (11)   |
| <i>dfmr1<sup>3</sup>/atx2<sup>x1</sup></i>                             |                              | 0.68 ± 0.02 (12) | 0.64 ± 0.02 (11)   |
| <i>me31B<sup>Δ2</sup>/dfmr1<sup>3</sup></i>                            |                              | 0.70 ± 0.02 (12) | 0.60 ± 0.01 (12)   |
| <i>ago1<sup>K08121</sup>/dfmr1<sup>3</sup></i>                         |                              | 0.63 ± 0.04 (9)  | 0.55 ± 0.01 (9)    |
| <i>dfmr1<sup>3</sup>/+</i>                                             |                              | 0.64 ± 0.01 (15) | 0.32 ± 0.01 (15)   |
| <i>me31B<sup>Δ2</sup>/+</i>                                            |                              | 0.56 ± 0.02 (9)  | 0.32 ± 0.02 (9)    |
| <i>atx2<sup>x1</sup>/+</i>                                             |                              | 0.66 ± 0.04 (10) | 0.30 ± 0.02 (10)   |
| <i>ago1<sup>K08121</sup>/+</i>                                         |                              | 0.65 ± 0.02 (9)  | 0.32 ± 0.05 (9)    |
| <i>P[Atx2<sup>+</sup>]; dfmr1<sup>3</sup>/atx2<sup>x1</sup></i>        |                              | 0.68 ± 0.02 (10) | 0.37 ± 0.01 (10)   |
| <i>P[dfmr1<sup>+</sup>], dfmr1<sup>3</sup>/atx2<sup>x1</sup></i>       |                              | 0.70 ± 0.02 (8)  | 0.36 ± 0.02 (8)    |
| <i>me31B<sup>Δ2</sup>/+; P[dfmr1<sup>+</sup>]/dfmr1<sup>3</sup></i>    |                              | 0.67 ± 0.03 (9)  | 0.38 ± 0.03 (9)    |
| <i>ago1<sup>K08121</sup>/+; P[dfmr1<sup>+</sup>]/dfmr1<sup>3</sup></i> |                              | 0.66 ± 0.03 (10) | 0.41 ± 0.03 (10)   |
| <i>LN1GAL4, tubGAL80ts &lt;UASdfmr1RNAi</i>                            | at 18 °C                     | 0.70 ± 0.04 (9)  | 0.33 ± 0.03 (9)    |
| <i>LN1GAL4, tubGAL80ts &lt;UASdfmr1RNAi</i>                            | at 29 °C                     | 0.78 ± 0.04 (10) | 0.64 ± 0.02 (10)   |
| <i>LN1GAL4, tubGAL80ts &lt;UASAtx2RNAi</i>                             | at 29 °C                     | 0.62 ± 0.02 (9)  | 0.64 ± 0.03 (9)    |
|                                                                        | 5% CO <sub>2</sub> (4 d)     |                  |                    |
| CS                                                                     |                              | 0.68 ± 0.01(10)  | 0.36 ± 0.01 (10)   |
| <i>dfmr1<sup>B55</sup></i>                                             |                              | 0.71 ± 0.03 (10) | 0.69 ± 0.01 (10)   |
| <i>dfmr1<sup>3</sup></i>                                               |                              | 0.72 ± 0.04 (11) | 0.66 ± 0.01 (11)   |
| <i>P[dfmr1<sup>+</sup>], dfmr1<sup>3</sup></i>                         |                              | 0.71 ± 0.05 (11) | 0.33 ± 0.01 (11)   |
| <i>GH14GAL4, tubGAL80 &lt;UASdfmr1RNAi</i>                             |                              | 0.66 ± 0.01 (10) | 0.31 ± 0.01 (10)   |
| <i>GH14GAL4, tubGAL80ts &lt;UASdfmr1RNAi</i>                           | at 18 °C                     | 0.65 ± 0.01 (9)  | 0.36 ± 0.02 (9)    |
| <i>LN1GAL4, tubGAL80ts &lt;UASdfmr1RNAi</i>                            | at 29 °C                     | 0.59 ± 0.01 (8)  | 0.27 ± 0.03 (8)    |
| <i>LN1GAL4, tubGAL80ts &lt;UASdfmr1RNAi</i>                            | at 18 °C                     | 0.69 ± 0.03 (10) | 0.60 ± 0.02 (10)   |
| <i>LN1GAL4, tubGAL80ts &lt;UASAtx2RNAi</i>                             | at 29 °C                     | 0.59 ± 0.01 (11) | 0.65 ± 0.03 (11)   |
